# Supplementary material for: Osr1 regulates hepatic inflammation and cell survival in the progression of non-alcoholic fatty liver disease
Source: PubMed Central journal article supplement (PMC7987871; doi:10.1038/s41374-020-00493-2), 2020-10-01
Supplement: NIHMS1628942-supplement-1.pdf [file NIHMS1628942-supplement-1.pdf]

## Supplementary information

**Table 1S** Primer sets used for RT-PCR

|                    | <i>Forward(5'-3')</i>          | <i>Reverse(5'-3')</i>          |
|--------------------|--------------------------------|--------------------------------|
| <i>Osr1</i>        | <i>CCATCCCTGCAGCTTACCAA</i>    | <i>GCATGAAGAGCGCTGAAACC</i>    |
| <i>Osr1_human</i>  | <i>CGTTCTCAGCTGCTCCTGGTT</i>   | <i>GTTTTGCTGCCCATTTTCGGTA</i>  |
| <i>Chrebp</i>      | <i>CCAGCAGGGAAGGGGATTC</i>     | <i>AGAGCTGTTTCGCACCATCG</i>    |
| <i>Scd-1</i>       | <i>AACACCCCGATAGCAATATCCA</i>  | <i>AGAGAACTGGAGACGGGAGT</i>    |
| <i>Apat1</i>       | <i>CTGGTTCGTTTCGGTCCTCA</i>    | <i>CCATGAGACCCATCATGTCCA</i>   |
| <i>Tgf-β</i>       | <i>TCGCTTTGTACAACAGCACC</i>    | <i>ACTGCTTCCCGAATGTCTGA</i>    |
| <i>Fn1</i>         | <i>TGCTCGTGAATCCTCTTGAACA</i>  | <i>AACCTGTTTCCAATGGGCCT</i>    |
| <i>Il-β</i>        | <i>AAATACCTGTGGCCTTGGGC</i>    | <i>CTTGGGATCCACACTCTCCAG</i>   |
| <i>Il-6</i>        | <i>CCAGAGATACAAAGAAATGATGG</i> | <i>ACTCCAGAAGACCAGAGGAAA</i>   |
| <i>Tnf-α</i>       | <i>AGCCGATGGGTTGTACCT-TG</i>   | <i>ATAGCAAATCGGCTGACG-GT</i>   |
| <i>Ccl-2</i>       | <i>AGCACCAGCCAACTCTCACT</i>    | <i>CGTAACTGCATCTGGCTGA</i>     |
| <i>Il-8</i>        | <i>ATGCCTCTCCATTTCTGCT</i>     | <i>CATGGGGAAAGAGGCTCTGA</i>    |
| <i>Il-10</i>       | <i>TGAATTCCCTGGGTGAGAAG</i>    | <i>TCACTCTTCACCTGCTCCACT</i>   |
| <i>Bcl-2</i>       | <i>GTCGCTACCGTCGTGACTTC</i>    | <i>CAGACATGCACCTACCCAGC</i>    |
| <i>Casp3</i>       | <i>TGGTGATGAAGGGGTCATTTATG</i> | <i>TTCGGCTTTCCAGTCAGACTC</i>   |
| <i>Bid</i>         | <i>GCCGAGCACATCACAGACC</i>     | <i>TGGCAATGTTGTGGATGATTTCT</i> |
| <i>Trp53</i>       | <i>CTCTCCCCCGCAAAGAAAAA</i>    | <i>CGGAACATCTCGAAGCGTTTA</i>   |
| <i>Casp8</i>       | <i>TGCTTGGACTACATCCCACAC</i>   | <i>TGCAGTCTAGGAAGTTGACCA</i>   |
| <i>Casp9</i>       | <i>TCCTGGTACATCGAGACCTTG</i>   | <i>AAGTCCCTTTTCGCAGAAACAG</i>  |
| <i>Bcl-2_human</i> | <i>CTGGTGGGAGCTTGCATCAC</i>    | <i>ACAGCCTGCAGCTTTGTTTC</i>    |
| <i>Bid_human</i>   | <i>ACTGGTGTTTGGCTTCTCC</i>     | <i>ATTCTTCCCAAGCGGGAGTG</i>    |
| <i>Casp8_human</i> | <i>CAGCAAAGGGGAGGAGTT</i>      | <i>CTTCAAAGGTCGTGGTCAAA</i>    |
| <i>Atm</i>         | <i>GATCTGCTCATTTGCTGCCG</i>    | <i>GTGTGGTGGCTGATACATTTGAT</i> |

|              |                                |                                |
|--------------|--------------------------------|--------------------------------|
| <i>Cdk2</i>  | <i>CCTGCTTATCAATGCAGAGGG</i>   | <i>TGCGGGTCACCATTTTCAGC</i>    |
| <i>Cdk4</i>  | <i>ATGGCTGCCACTCGATATGAA</i>   | <i>TCCTCCATTAGGAACTCTCACAC</i> |
| <i>Cdk6</i>  | <i>GGCGTACCCACAGAAACCATA</i>   | <i>AGGTAAGGGCCATCTGAAAACCT</i> |
| <i>Chk1</i>  | <i>GTTAAGCCACGAGAATGTAGTGA</i> | <i>GATACTGGATATGGCCTTCCCT</i>  |
| <i>Chk2</i>  | <i>TGACAGTGCTTCCTGTTTACA</i>   | <i>GAGCTGGACGAACCCTGATA</i>    |
| <i>Pai</i>   | <i>TTCAGCCCTTGCTTGCCTC</i>     | <i>ACACTTTTACTCCGAAGTCGGT</i>  |
| <i>Pten</i>  | <i>TTTGCTAGTGAGTGGAATCCTCT</i> | <i>TGTGACAAAAGTGACACAGATCA</i> |
| <i>Cip1</i>  | <i>CCTGGTGATGTCCGACCTG</i>     | <i>CCATGAGCGCATCGCAATC</i>     |
| <i>Cycb1</i> | <i>AAGGTGCCTGTGTGTGAACC</i>    | <i>GTCAGCCCCATCATCTGCG</i>     |
| <i>Cycd2</i> | <i>GAGTGGGAACTGGTAGTGTTG</i>   | <i>CGCACAGAGCGATGAAGGT</i>     |

**Figure 1S.**

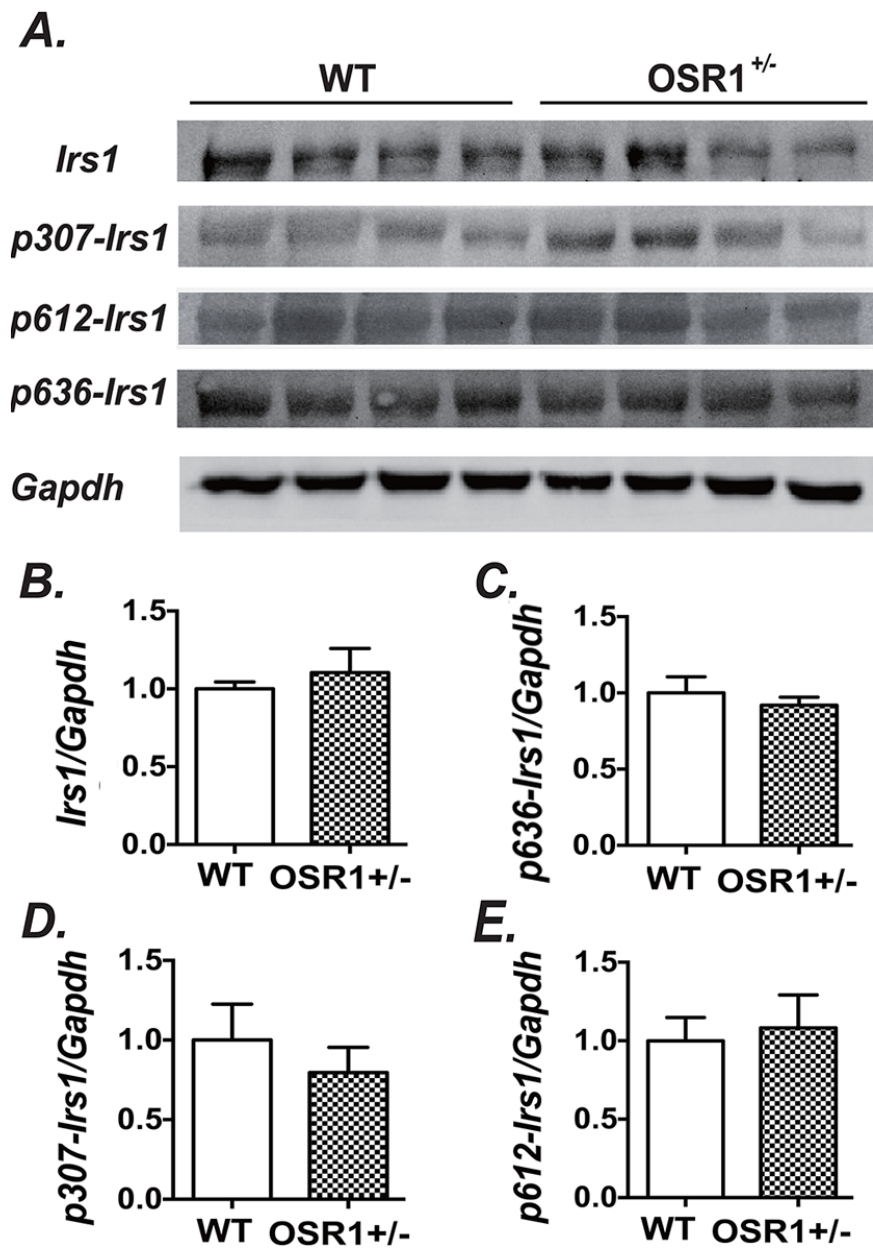

**Figure 1S.** By protein blotting technique, the insulin signaling genes of *Irs-1* and the phosphorylation of *Irs1* at 307, 612 and 636 were all found to be similar between liver tissues of *Osrl*<sup>+/-</sup> and wildtype mice.

Data of figures 1S A-E is presented as Mean ± SE, n=4.

**Figure 2S.**

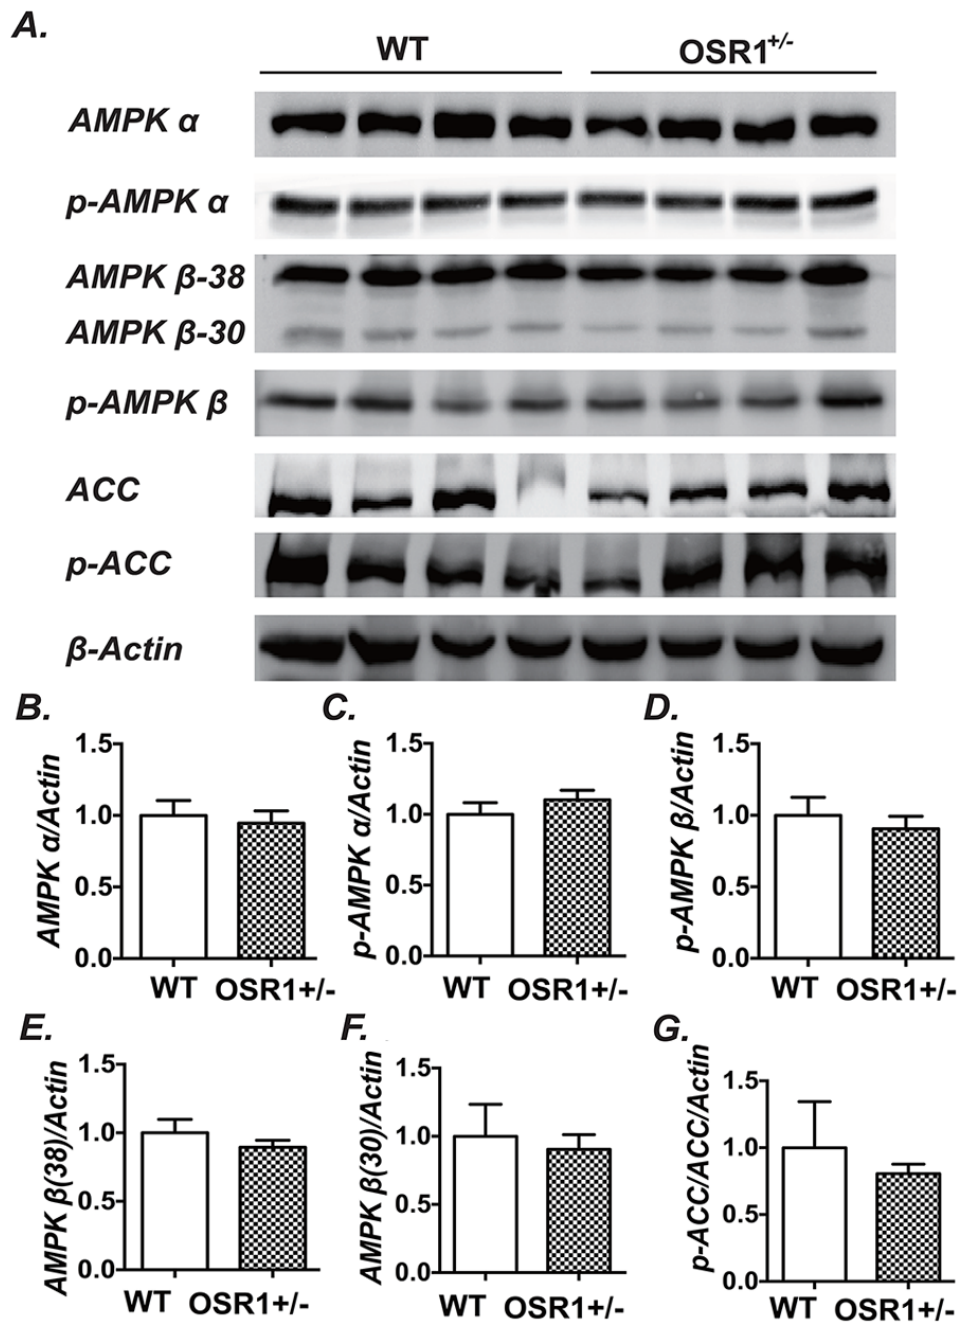

**Figure 2S.** By protein blotting technique, the genes involved in cellular energy homeostasis, such as *AMPK- $\alpha$* , *- $\beta$* , *Acc* and their phosphorylated forms, displayed similar expression levels between *Osr1*<sup>+/-</sup> and wildtype livers.

Data of figures 2S A-G is presented as Mean  $\pm$  SE, n=4.
